# Supplementary material
Source: publisher figshare collection journal article supplement (https://karger.figshare.com/ndownloader/files/36006794)

## Dementia vs MCI

Thickness

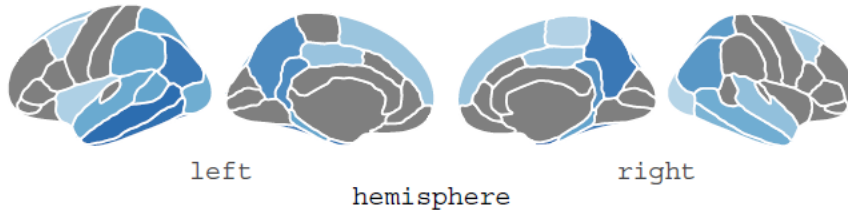

$\beta$

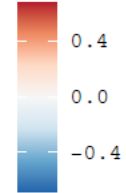

Volume

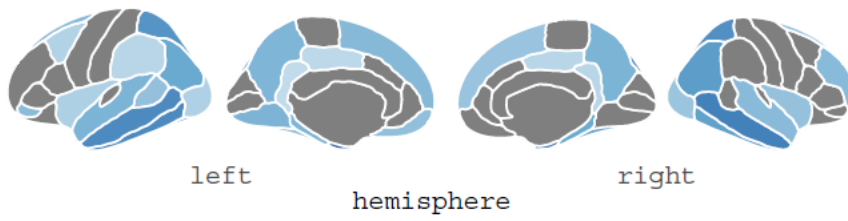

$\beta$

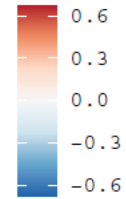

Area

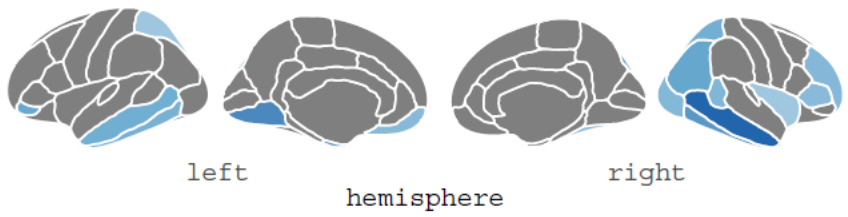

$\beta$

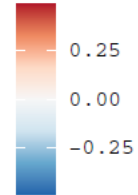

Supplement: Supplementary file 1 [file 36006794]
